# Supplementary material for: Do Brain-Derived Neurotrophic Factor Genetic Polymorphisms Modulate the Efficacy of Motor Cortex Plasticity Induced by Non-invasive Brain Stimulation? A Systematic Review
Source: PubMed Central journal article supplement (PMC8505675; doi:10.3389/fnhum.2021.742373), 2021-09-28
Supplement: Data_Sheet_1.pdf [file Data_Sheet_1.pdf]

## Supplementary Data

**Supplementary table 1.** Support for judgement on MEP changes before and after facilitatory NIBS techniques and between BDNF genotypes in healthy participants.

| # | Study                 | Group       | NIBS technique | MEP changes | Support for judgement on MEP changes before and after NIBS                                                                                                                                                                                                                                                                                                                                                                                  | Genotype effect | Support for judgement on MEP changes between genotypes                                                                                                                                                                                                                                                                               |   |                       |         |      |   |                                                                                                                                                                                                                                                                                                                                                                                                                                             |    |                                                                                                                                                                                                                                                                                                                                      |             |   |   |                      |         |      |   |                                                                                                                                                                                                                                                                                                                                                                                                                                             |    |                                                                                                                                                                                                                                                                                                                                      |             |   |   |                   |         |      |   |                                                                                                                                                                                                                                                                                                                                                                                                                                             |
|---|-----------------------|-------------|----------------|-------------|---------------------------------------------------------------------------------------------------------------------------------------------------------------------------------------------------------------------------------------------------------------------------------------------------------------------------------------------------------------------------------------------------------------------------------------------|-----------------|--------------------------------------------------------------------------------------------------------------------------------------------------------------------------------------------------------------------------------------------------------------------------------------------------------------------------------------|---|-----------------------|---------|------|---|---------------------------------------------------------------------------------------------------------------------------------------------------------------------------------------------------------------------------------------------------------------------------------------------------------------------------------------------------------------------------------------------------------------------------------------------|----|--------------------------------------------------------------------------------------------------------------------------------------------------------------------------------------------------------------------------------------------------------------------------------------------------------------------------------------|-------------|---|---|----------------------|---------|------|---|---------------------------------------------------------------------------------------------------------------------------------------------------------------------------------------------------------------------------------------------------------------------------------------------------------------------------------------------------------------------------------------------------------------------------------------------|----|--------------------------------------------------------------------------------------------------------------------------------------------------------------------------------------------------------------------------------------------------------------------------------------------------------------------------------------|-------------|---|---|-------------------|---------|------|---|---------------------------------------------------------------------------------------------------------------------------------------------------------------------------------------------------------------------------------------------------------------------------------------------------------------------------------------------------------------------------------------------------------------------------------------------|
| 1 | Antal et al. (2010)   | Val/Val     | iTBS           | ↑           | ANOVA of the normalized data revealed a significant main effect of TIME                                                                                                                                                                                                                                                                                                                                                                     | NS              | Although authors said that excitability enhancement was more pronounced in the Val/Met group, the Genotype * Time interaction was not significant                                                                                                                                                                                    |   |                       |         |      |   |                                                                                                                                                                                                                                                                                                                                                                                                                                             |    |                                                                                                                                                                                                                                                                                                                                      |             |   |   |                      |         |      |   |                                                                                                                                                                                                                                                                                                                                                                                                                                             |    |                                                                                                                                                                                                                                                                                                                                      |             |   |   |                   |         |      |   |                                                                                                                                                                                                                                                                                                                                                                                                                                             |
|   |                       | Val/Met     |                | ↑           |                                                                                                                                                                                                                                                                                                                                                                                                                                             |                 |                                                                                                                                                                                                                                                                                                                                      | 2 | Cheeran et al. (2008) | Val/Val | iTBS | ↑ | There was a significant increase in MEPs after iTBS in the Val/Val but not in the non-Val/Val                                                                                                                                                                                                                                                                                                                                               | SD | There was a significant increase in MEP after iTBS in Val/Val but not in the non-Val/Val group                                                                                                                                                                                                                                       | Non-Val/Val | → | 3 | Guerra et al. (2020) | Val/Val | iTBS | → | From Fig. 2 in the article                                                                                                                                                                                                                                                                                                                                                                                                                  | NS | From Fig. 2 in the article                                                                                                                                                                                                                                                                                                           | Non-Val/Val | → | 4 | Lee et al. (2013) | Val/Val | iTBS | → | Results showed the increases in MEP were statistically significant in Val/Val, but not in the other groups at 100% RMT by t-test. Moreover, at 120 and 140% intensities, MEP increased significantly in Val/Val and Val/Met. However, authors said that the iTBS paradigm tended to increase MEP at all the three stimulus intensities regardless of genotypes before t-test, and thus it would probably mean there was no significant time |
| 2 | Cheeran et al. (2008) | Val/Val     | iTBS           | ↑           | There was a significant increase in MEPs after iTBS in the Val/Val but not in the non-Val/Val                                                                                                                                                                                                                                                                                                                                               | SD              | There was a significant increase in MEP after iTBS in Val/Val but not in the non-Val/Val group                                                                                                                                                                                                                                       |   |                       |         |      |   |                                                                                                                                                                                                                                                                                                                                                                                                                                             |    |                                                                                                                                                                                                                                                                                                                                      |             |   |   |                      |         |      |   |                                                                                                                                                                                                                                                                                                                                                                                                                                             |    |                                                                                                                                                                                                                                                                                                                                      |             |   |   |                   |         |      |   |                                                                                                                                                                                                                                                                                                                                                                                                                                             |
|   |                       | Non-Val/Val |                | →           |                                                                                                                                                                                                                                                                                                                                                                                                                                             |                 |                                                                                                                                                                                                                                                                                                                                      | 3 | Guerra et al. (2020)  | Val/Val | iTBS | → | From Fig. 2 in the article                                                                                                                                                                                                                                                                                                                                                                                                                  | NS | From Fig. 2 in the article                                                                                                                                                                                                                                                                                                           | Non-Val/Val | → | 4 | Lee et al. (2013)    | Val/Val | iTBS | → | Results showed the increases in MEP were statistically significant in Val/Val, but not in the other groups at 100% RMT by t-test. Moreover, at 120 and 140% intensities, MEP increased significantly in Val/Val and Val/Met. However, authors said that the iTBS paradigm tended to increase MEP at all the three stimulus intensities regardless of genotypes before t-test, and thus it would probably mean there was no significant time | NS | Authors said that the iTBS paradigm tended to increase MEP at all the three stimulus intensities (100, 120, and 140% RMT) regardless of genotypes. This statement would mean there were no significant results through ANOVA, but ANOVA results were not listed. When we looked Fig. 2C, different MEP changes were observed between | Val/Met     | → |   |                   | Met/Met |      | → |                                                                                                                                                                                                                                                                                                                                                                                                                                             |
| 3 | Guerra et al. (2020)  | Val/Val     | iTBS           | →           | From Fig. 2 in the article                                                                                                                                                                                                                                                                                                                                                                                                                  | NS              | From Fig. 2 in the article                                                                                                                                                                                                                                                                                                           |   |                       |         |      |   |                                                                                                                                                                                                                                                                                                                                                                                                                                             |    |                                                                                                                                                                                                                                                                                                                                      |             |   |   |                      |         |      |   |                                                                                                                                                                                                                                                                                                                                                                                                                                             |    |                                                                                                                                                                                                                                                                                                                                      |             |   |   |                   |         |      |   |                                                                                                                                                                                                                                                                                                                                                                                                                                             |
|   |                       | Non-Val/Val |                | →           |                                                                                                                                                                                                                                                                                                                                                                                                                                             |                 |                                                                                                                                                                                                                                                                                                                                      | 4 | Lee et al. (2013)     | Val/Val | iTBS | → | Results showed the increases in MEP were statistically significant in Val/Val, but not in the other groups at 100% RMT by t-test. Moreover, at 120 and 140% intensities, MEP increased significantly in Val/Val and Val/Met. However, authors said that the iTBS paradigm tended to increase MEP at all the three stimulus intensities regardless of genotypes before t-test, and thus it would probably mean there was no significant time | NS | Authors said that the iTBS paradigm tended to increase MEP at all the three stimulus intensities (100, 120, and 140% RMT) regardless of genotypes. This statement would mean there were no significant results through ANOVA, but ANOVA results were not listed. When we looked Fig. 2C, different MEP changes were observed between | Val/Met     | → |   |                      | Met/Met |      | → |                                                                                                                                                                                                                                                                                                                                                                                                                                             |    |                                                                                                                                                                                                                                                                                                                                      |             |   |   |                   |         |      |   |                                                                                                                                                                                                                                                                                                                                                                                                                                             |
| 4 | Lee et al. (2013)     | Val/Val     | iTBS           | →           | Results showed the increases in MEP were statistically significant in Val/Val, but not in the other groups at 100% RMT by t-test. Moreover, at 120 and 140% intensities, MEP increased significantly in Val/Val and Val/Met. However, authors said that the iTBS paradigm tended to increase MEP at all the three stimulus intensities regardless of genotypes before t-test, and thus it would probably mean there was no significant time | NS              | Authors said that the iTBS paradigm tended to increase MEP at all the three stimulus intensities (100, 120, and 140% RMT) regardless of genotypes. This statement would mean there were no significant results through ANOVA, but ANOVA results were not listed. When we looked Fig. 2C, different MEP changes were observed between |   |                       |         |      |   |                                                                                                                                                                                                                                                                                                                                                                                                                                             |    |                                                                                                                                                                                                                                                                                                                                      |             |   |   |                      |         |      |   |                                                                                                                                                                                                                                                                                                                                                                                                                                             |    |                                                                                                                                                                                                                                                                                                                                      |             |   |   |                   |         |      |   |                                                                                                                                                                                                                                                                                                                                                                                                                                             |
|   |                       | Val/Met     |                | →           |                                                                                                                                                                                                                                                                                                                                                                                                                                             |                 |                                                                                                                                                                                                                                                                                                                                      |   |                       |         |      |   |                                                                                                                                                                                                                                                                                                                                                                                                                                             |    |                                                                                                                                                                                                                                                                                                                                      |             |   |   |                      |         |      |   |                                                                                                                                                                                                                                                                                                                                                                                                                                             |    |                                                                                                                                                                                                                                                                                                                                      |             |   |   |                   |         |      |   |                                                                                                                                                                                                                                                                                                                                                                                                                                             |
|   |                       | Met/Met     |                | →           |                                                                                                                                                                                                                                                                                                                                                                                                                                             |                 |                                                                                                                                                                                                                                                                                                                                      |   |                       |         |      |   |                                                                                                                                                                                                                                                                                                                                                                                                                                             |    |                                                                                                                                                                                                                                                                                                                                      |             |   |   |                      |         |      |   |                                                                                                                                                                                                                                                                                                                                                                                                                                             |    |                                                                                                                                                                                                                                                                                                                                      |             |   |   |                   |         |      |   |                                                                                                                                                                                                                                                                                                                                                                                                                                             |

effect using ANOVA. We finally judged there was no significant time effect for each TMS intensity condition.

genotype groups by t-test. However, we judged there was no significant difference between groups based on the above ANOVA results.

|   |                        |             |      |     |                                                                                                |    |                                                                                                                    |
|---|------------------------|-------------|------|-----|------------------------------------------------------------------------------------------------|----|--------------------------------------------------------------------------------------------------------------------|
|   |                        | Val/Val     |      | →   |                                                                                                |    |                                                                                                                    |
|   |                        | Val/Met     | iTBS | →   |                                                                                                | NS |                                                                                                                    |
|   |                        | Met/Met     |      | →   |                                                                                                |    |                                                                                                                    |
|   |                        | Val/Val     |      | →   |                                                                                                |    |                                                                                                                    |
|   |                        | Val/Met     | iTBS | →   |                                                                                                | NS |                                                                                                                    |
|   |                        | Met/Met     |      | →   |                                                                                                |    |                                                                                                                    |
| 5 | Li Volti et al. (2011) | Val/Val     | iTBS | ↑   | ANOVA showed a significant main effect of time, no significant effect of Group and interaction | NS | Between group ANOVA for MEP size after iTBS showed a no significant effect of Group and no significant interaction |
|   |                        | Val/Met     |      | ↑   |                                                                                                |    |                                                                                                                    |
| 6 | Marsili et al. (2017)  | Val/Val     | iTBS | ↑ ↑ | ANOVAs showed a significant main effect of time (iTBS: P < 0.001)                              | SD | iTBS and induced greater changes in Val/Val compared to Met carriers at T5, T15, and T30                           |
|   |                        | Non-Val/Val |      | ↑   |                                                                                                |    |                                                                                                                    |
| 7 |                        | Val/Val     | iTBS | ↑   |                                                                                                | NS | ANOVAs for monophasic MEP revealed no impact of polymorphism                                                       |

|    |                         |             |        |    |                                                                                                            |    |                                                                                                            |
|----|-------------------------|-------------|--------|----|------------------------------------------------------------------------------------------------------------|----|------------------------------------------------------------------------------------------------------------|
|    |                         | Val/Met     |        | ↑  | One sampled t-tests confirmed that iTBS consistently induced an increase in monophasic MEP                 |    |                                                                                                            |
|    | Mastroeni et al. (2013) | Val/Val     | iTBS   | ↑  | One sampled t-tests confirmed that iTBS consistently induced an increase in monophasic MEP                 | NS | ANOVAs for biphasic MEP revealed no impact of polymorphism                                                 |
|    |                         | Val/Met     |        | ↑  |                                                                                                            |    |                                                                                                            |
| 1  | Antal et al. (2010)     | Val/Val     | A-tDCS | ↑  | There was a significant increase in MEPs after A-tDCS in both groups                                       | SD | The enhancement was more pronounced in Val/Met (Val/Val: T20, $P < 0.03$ ; Val/Met: T0-T60, $P < 0.01$ )   |
|    |                         | Val/Met     |        | ↑↑ |                                                                                                            |    |                                                                                                            |
| 8  | Fujiyama et al. (2014)  | Val/Val     | A-tDCS | →  | All main effects and interactions including Sex and/or BDNF as a factor were not statistically significant | NS | All main effects and interactions including Sex and/or BDNF as a factor were not statistically significant |
|    |                         | Non-Val/Val |        | →  |                                                                                                            |    |                                                                                                            |
| 9  | Jonker et al. (2021)    | Val/Val     | A-tDCS | →  | None of the models showed a main effect of tDCS on cortical excitability                                   | NS | The BDNF model did not show an interaction effect of the BDNF genotype                                     |
|    |                         | Non-Val/Val |        | →  |                                                                                                            |    |                                                                                                            |
| 10 | Strube et al. (2015)    | Val/Val     | A-tDCS | ↑  | MEP increased in both groups following A-tDCS, demonstrated by a significant main effect for time          | NS | There was no significant difference between genotype groups by t-test                                      |
|    |                         | Non-Val/Val |        | ↑  |                                                                                                            |    |                                                                                                            |

|    |                       |             |        |                                                                                                                                          |    |                                                                                                                                          |                                                                                           |    |                                                                                          |
|----|-----------------------|-------------|--------|------------------------------------------------------------------------------------------------------------------------------------------|----|------------------------------------------------------------------------------------------------------------------------------------------|-------------------------------------------------------------------------------------------|----|------------------------------------------------------------------------------------------|
| 11 | Teo et al. (2014)     | Val/Val     | →      | ANOVA using the between-subject factor 'genotype' and within-subject factor 'time' showed no effect of 'genotype', 'time' or interaction | NS | ANOVA using the between-subject factor 'genotype' and within-subject factor 'time' showed no effect of 'genotype', 'time' or interaction |                                                                                           |    |                                                                                          |
|    |                       | Val/Met     | A-tDCS |                                                                                                                                          |    |                                                                                                                                          | →                                                                                         |    |                                                                                          |
|    |                       | Met/Met     | →      |                                                                                                                                          |    |                                                                                                                                          |                                                                                           |    |                                                                                          |
|    |                       | Val/Val     | →      |                                                                                                                                          |    |                                                                                                                                          |                                                                                           |    |                                                                                          |
|    |                       | Non-Val/Val | ↑      | Met carriers showed a significantly increased cortical excitability after A-tDCS                                                         | NS | ANOVA showed a significantly increased MEP for Met carriers after A-tDCS, but no difference between groups                               |                                                                                           |    |                                                                                          |
|    |                       |             |        |                                                                                                                                          |    |                                                                                                                                          |                                                                                           |    |                                                                                          |
| 1  | Antal et al. (2010)   | Val/Val     | →      | ANOVA of the normalized data revealed no significant main effect of TIME                                                                 | NS | ANOVA of the normalized data revealed no significant main effect of Genotype, and the interaction                                        |                                                                                           |    |                                                                                          |
|    |                       | Val/Met     | tRNS   |                                                                                                                                          |    |                                                                                                                                          | →                                                                                         |    |                                                                                          |
| 2  | Cheeran et al. (2008) | Val/Val     | →      | In Val/Val, PAS produced a borderline significant increase in APB ( $P = 0.07$ ) but not in the non-Val/Val                              | NS | In Val/Val, PAS produced a borderline significant increase in APB ( $P = 0.07$ ) but not in non-Val/Val                                  |                                                                                           |    |                                                                                          |
|    |                       | Non-Val/Val | PAS    |                                                                                                                                          |    |                                                                                                                                          | →                                                                                         |    |                                                                                          |
|    |                       | Val/Val     | ↑      |                                                                                                                                          |    |                                                                                                                                          | In Val/Val, PAS produced a significant increase of the MEPs in ADM but not in non-Val/Val | SD | In Val/Val, PAS produced a significant increase of the MEP in ADM but not in non-Val/Val |
|    |                       | Non-Val/Val | PAS    |                                                                                                                                          |    |                                                                                                                                          | →                                                                                         |    |                                                                                          |

|    |                        |             |      |    |                                                                                                                      |    |                                                                                                                                                              |
|----|------------------------|-------------|------|----|----------------------------------------------------------------------------------------------------------------------|----|--------------------------------------------------------------------------------------------------------------------------------------------------------------|
| 12 | Cirillo et al. (2012)  | Val/Val     |      | ↑  | FDI MEP was significantly greater in the Val/Val after PAS, but there was no effect of PAS in the Val/Met or Met/Met | SD | FDI MEP amplitude was significantly greater in the Val/Val after PAS, but there was no effect of PAS in the Val/Met or Met/Met                               |
|    |                        | Val/Met     | PAS  | →  |                                                                                                                      |    |                                                                                                                                                              |
|    |                        | Met/Met     |      | →  |                                                                                                                      |    |                                                                                                                                                              |
|    |                        | Val/Val     |      | ↑  | For the non-target ADM, there was a significant increase in MEP, but no difference between groups and no interaction | NS | For the non-target ADM, there was a significant increase in MEP for all subjects combined (time effect), but no difference between groups and no interaction |
|    |                        | Val/Met     | PAS  | ↑  |                                                                                                                      |    |                                                                                                                                                              |
|    |                        | Met/Met     |      | ↑  |                                                                                                                      |    |                                                                                                                                                              |
| 13 | Missitzi et al. (2011) | Val/Val     |      | ↑  | In Met alleles, PAS led to no enhancement of MEP. In contrast, MEP was enhanced in Val/Val.                          | SD | In Met alleles, PAS led to no enhancement of MEP. In contrast, MEP was enhanced in Val/Val.                                                                  |
|    |                        | Non-Val/Val |      | →  |                                                                                                                      |    |                                                                                                                                                              |
| 14 | Player et al. (2013)   | Val/Val     |      | ↑  | Tests of simple effects found a significant increase in the MEP after PAS for the healthy group                      | NS | There was no significant effect of genotype, and no group (healthy vs. depressed patients)-genotype interaction                                              |
|    |                        | Non-Val/Val |      | ↑  |                                                                                                                      |    |                                                                                                                                                              |
| 15 | Witte et al. (2012)    | Val/Val     |      | ?  | Not listed                                                                                                           | NS | There was no significant difference between genotype groups by t-test                                                                                        |
|    |                        | Non-Val/Val |      |    |                                                                                                                      |    |                                                                                                                                                              |
| 16 | Hwang et al. (2015)    | Val/Val     |      | ↑↑ | From Fig. 2 in the article                                                                                           | SD | From Fig. 2 in the article (rTMS with subthreshold intensity)                                                                                                |
|    |                        | Val/Met     | rTMS | ↑↑ |                                                                                                                      |    |                                                                                                                                                              |

|    |                        |             |      |    |                                                                              |    |                                                                                              |
|----|------------------------|-------------|------|----|------------------------------------------------------------------------------|----|----------------------------------------------------------------------------------------------|
|    |                        | Met/Met     |      | ↑  |                                                                              |    |                                                                                              |
|    |                        | Val/Val     |      | ↑↑ |                                                                              |    |                                                                                              |
|    |                        | Val/Met     | rTMS | ↑  | From Fig. 2 in the article                                                   | SD | From Fig. 2 in the article (rTMS with suprathreshold intensity)                              |
|    |                        | Met/Met     |      | ↑  |                                                                              |    |                                                                                              |
| 17 | Nakamura et al. (2011) | Val/Val     |      | ↑  | Post hoc analyses revealed that significant potentiation was elicited by QPS | NS | ANOVA revealed no significant effect of Group, and no significant interaction (Group * Time) |
|    |                        | Non-Val/Val | QPS  | ↑  |                                                                              |    |                                                                                              |

Abbreviations: ADM, abductor digiti minimi; ANOVA, analysis of variance; A-tDCS, anodal transcranial direct current stimulation; BDNF, brain-derived neurotrophic factor; FDI, first dorsal interosseus; iTBS, intermittent theta burst stimulation; NIBS, noninvasive brain stimulation; Non-Val/Val, Val/Met+Met/Met; NS, not significant; MEP, motor-evoked potential; PAS, paired associative stimulation; QPS, quadripulse transcranial magnetic stimulation; rTMS, repetitive transcranial magnetic stimulation; RMT, resting motor threshold; SD, significant difference; T, timepoint; tACS, transcranial alternating current stimulation; tRNS, transcranial random noise stimulation.

**Supplementary table 2.** Support for judgement on MEP changes before and after inhibitory NIBS techniques and between BDNF genotypes in healthy participants.

| # | Study                   | Group       | NIBS technique | MEP changes | Support for judgement on MEP changes                                                 | Genotype effect | Support for judgement on MEP changes between                                                                                                                 |
|---|-------------------------|-------------|----------------|-------------|--------------------------------------------------------------------------------------|-----------------|--------------------------------------------------------------------------------------------------------------------------------------------------------------|
|   |                         |             |                |             | before and after NIBS                                                                |                 | BDNF genotypes                                                                                                                                               |
| 1 | Cheeran et al. (2008)   | Val/Val     | cTBS           | ↓           | There was a significant decrease in MEP after cTBS in Val/Val but not in non-Val/Val | SD              | There was a significant decrease in MEPs after cTBS in Val/Val but not in non-Val/Val group                                                                  |
|   |                         | Non-Val/Val |                | →           |                                                                                      |                 |                                                                                                                                                              |
| 2 | Guerra et al. (2020)    | Val/Val     | cTBS           | →           | From Fig. 3 in the article                                                           | NS              | From Fig. 3 in the article                                                                                                                                   |
|   |                         | Non-Val/Val |                | →           |                                                                                      |                 |                                                                                                                                                              |
| 3 | Jannati et al. (2017)   | Val/Val     | cTBS           | ?           | Only BDNF genotype groups were compared by t-test                                    | SD              | MEP at T10 was significantly reduced in BDNF Val/Met participants than in BDNF Val/Val participants                                                          |
|   |                         | Val/Met     |                | ?           |                                                                                      |                 |                                                                                                                                                              |
| 4 | Marsili et al. (2017)   | Val/Val     | cTBS           | ↓↓          | ANOVAs showed a significant main effect of time (cTBS: $P < 0.001$ )                 | SD              | cTBS and induced greater changes in Val/Val compared to Met carriers at T5, T15, and T30                                                                     |
|   |                         | Non-Val/Val |                | ↓           |                                                                                      |                 |                                                                                                                                                              |
| 5 | McDonnell et al. (2013) | Val/Val     | cTBS           | →           | From Fig. 5 in the article                                                           | NS              | The mixed-model analysis did not reveal a main effect of genotype, nor any genotype * time, genotype * condition, or genotype * condition* time interactions |
|   |                         | Non-Val/Val |                | →           |                                                                                      |                 |                                                                                                                                                              |

|   |                         |         |   |                                                                                          |                            |                                                                                                                                        |
|---|-------------------------|---------|---|------------------------------------------------------------------------------------------|----------------------------|----------------------------------------------------------------------------------------------------------------------------------------|
| 6 | Mastroeni et al. (2013) | Val/Val | ↓ | One sampled t-test confirmed that cTBS consistently induced a decrease in monophasic MEP | NS                         | ANOVA for monophasic MEP revealed no impact of polymorphism                                                                            |
|   |                         | Val/Met | ↓ |                                                                                          |                            |                                                                                                                                        |
|   |                         | Val/Val | ↓ | One sampled t-test confirmed that cTBS consistently induced a decrease in biphasic MEP   | NS                         | ANOVA for biphasic MEP revealed no impact of polymorphism                                                                              |
|   |                         | Val/Met | ↓ |                                                                                          |                            |                                                                                                                                        |
|   |                         | Val/Val | ↓ | One sampled t-test confirmed that cTBS consistently induced a decrease in monophasic MEP | NS                         | ANOVA for monophasic MEP revealed no impact of polymorphism                                                                            |
|   |                         | Val/Met | ↓ |                                                                                          |                            |                                                                                                                                        |
|   |                         | Val/Val | ↓ | One sampled t-tests confirmed that cTBS consistently induced a decrease in biphasic MEP  | NS                         | ANOVA for biphasic MEP revealed no impact of polymorphism                                                                              |
|   |                         | Val/Met | ↓ |                                                                                          |                            |                                                                                                                                        |
| 7 | Antal et al. (2010)     | Val/Val | ↓ | There was a significant decrease in MEP after C-tDCS in both genotype groups             | NS                         | Two-way ANOVA revealed no significant main effect of Genotype; however, the Time was significant. The interaction was not significant. |
|   |                         | Val/Met | ↓ |                                                                                          |                            |                                                                                                                                        |
|   |                         | Val/Val | ↓ | NS                                                                                       | From Fig. 2 in the article |                                                                                                                                        |



|    |                             |                        |        |        |                                                                                       |    |                                                                                              |
|----|-----------------------------|------------------------|--------|--------|---------------------------------------------------------------------------------------|----|----------------------------------------------------------------------------------------------|
|    | Cheeran et al.<br>(2008)    | Non-Val/Val            |        | ↓      | Val/Val and non-Val/Val showed the expected pattern of effects: C-tDCS suppressed MEP |    |                                                                                              |
| 8  | Di Lazzaro et al.<br>(2012) | Val/Val<br>Non-Val/Val | C-tDCS | ↓<br>↓ | Post hoc test showed a significant reduction of MEP immediately after stimulation     | NS | The BDNF genotype was not significant                                                        |
| 9  | Strube et al.<br>(2015)     | Val/Val<br>Non-Val/Val | C-tDCS | ↓<br>↓ | Plasticity response was observed in Val/Val and Non-Val/Val                           | NS | Independent-sample t-tests revealed no significant differences between genotype groups       |
| 10 | Nakamura et al.<br>(2011)   | Val/Val<br>Non-Val/Val | QPS    | ↓<br>↓ | Post hoc analyses showed significant suppression by QPS                               | NS | ANOVA revealed no significant effect of Group, and no significant interaction (group * time) |

Abbreviations: cTBS, continuous theta burst stimulation; C-tDCS, cathodal transcranial direct current stimulation; iTBS, intermittent theta burst stimulation; NIBS, noninvasive brain stimulation; Non-Val/Val, Val/Met+Met/Met; NS, not significant; MEP, motor-evoked potential; QPS, quadripulse transcranial magnetic stimulation; rTMS, repetitive transcranial magnetic stimulation; SD, significant difference; T, timepoint; tACS, transcranial alternating current stimulation.
